# Supplementary material for: Healthy and pro-inflammatory gut ecology plays a crucial role in the digestion and tolerance of a novel Gluten Friendly™ bread in celiac subjects: a randomized, double blind, placebo controlin vivostudy
Source: Royal Society of Chemistry journal article supplement (doi:10.1039/d1fo00490e), 2022-01-01
Supplement: d1fo00490e1.pdf [file d1fo00490e1.pdf]

1 Online Supporting Material

2  
3  
4  
5  
6  
7  
8  
9  
10  
11  
12  
13  
14  
15  
16  
17  
18  
19  
20  
21  
22  
23  
24  
25  
26  
27  
28  
29  
30  
31  
32  
33  
34  
35  
36  
37  
38  
39

**Healthy and pro-inflammatory gut ecology plays a crucial role in the digestion and tolerance of a novel Gluten Friendly™ bread in celiac subjects: a randomized, double blind, placebo control *in vivo* study**

Angelo Andriulli, Antonio Bevilacqua, Orazio Palmieri, Anna Latiano, Rosanna Fontana, Domenica Gioffreda, Stefano Castellana, Tommaso Mazza, Anna Panza, Claudia Menzaghi, Elvira Grandone, Lazzaro di Mauro, Ivana Decina, Michele Tricarico, Daniela Musaico, Markku Mäki, Jorma Isola, Alina Popp, Juha Taavela, Leonardo Petruzzi, Milena Sinigaglia, Maria Rosaria Corbo\* and Carmen Lamacchia\*

\*Correspondence to: [carmela.lamacchia@unifg.it](mailto:carmela.lamacchia@unifg.it) and [mariarosaria.corbo@unifg.it](mailto:mariarosaria.corbo@unifg.it)

**This PDF file includes:**

**FIGURES**

Figs. S1 to S7

**TABLES**

Tables S1 to S5

40  
41

42 **SUPPLEMENTAL FIGURES**

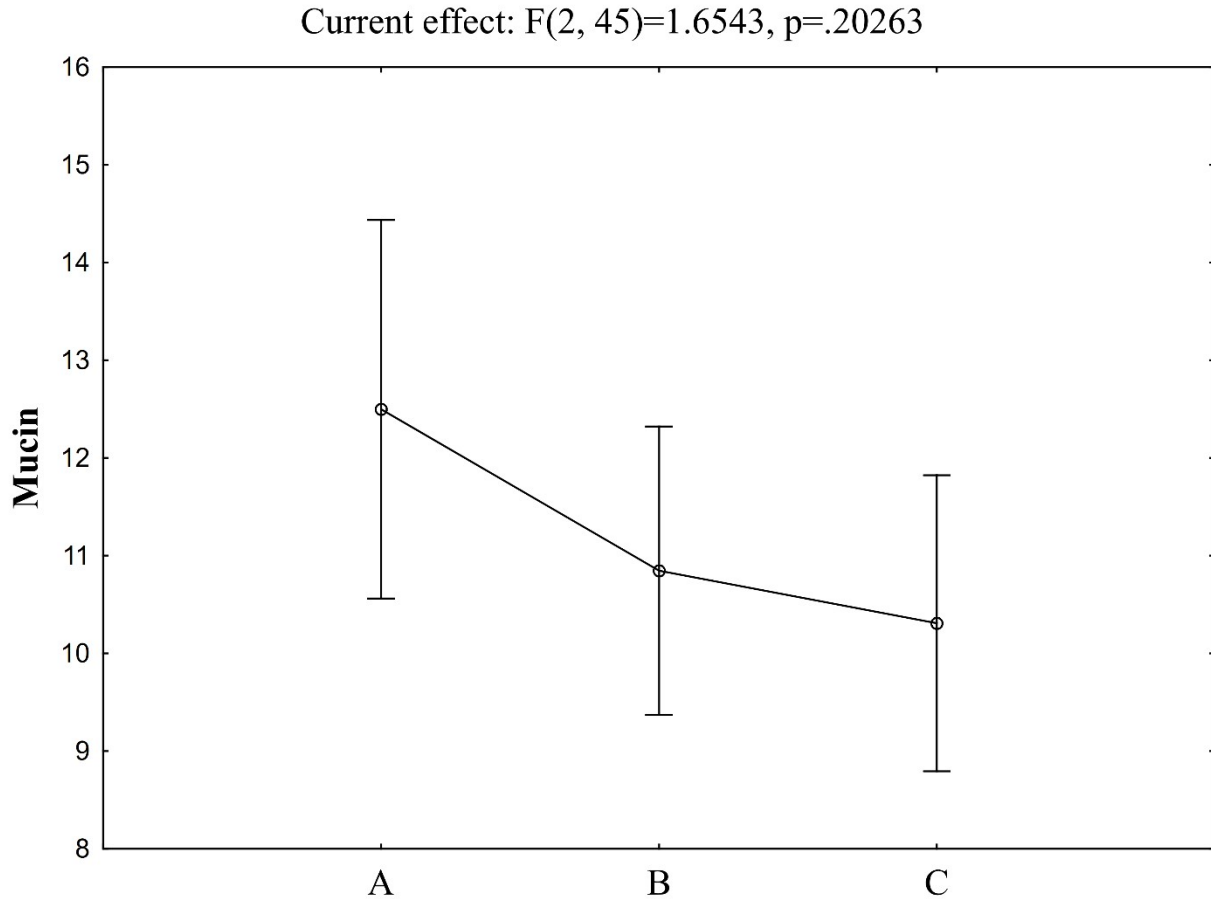

43

44 **Supplemental Figure 1: Mucin 2 at the end of trial in groups A, B and C**

45 Bars denote 95% confidence intervals. A, 0 g of GF daily; B, 3 g of GF daily; C, 6 g of GF daily.  
46 Expression of MUC2 in the villus epithelium goblet cells was visualized with anti-MUC2 antibody  
47 (Clone BSB-45, REF: BSB 6160, Bio SB Inc., Santa Barbara, CA. Diluted 1:250). The results were  
48 reported as number of MUC2+ cells per 100 enterocytes. Measurements were independent of clinical  
49 information.

50  
51  
52  
53

Current effect:  $F(2, 45)=1.2489, p=.29658$

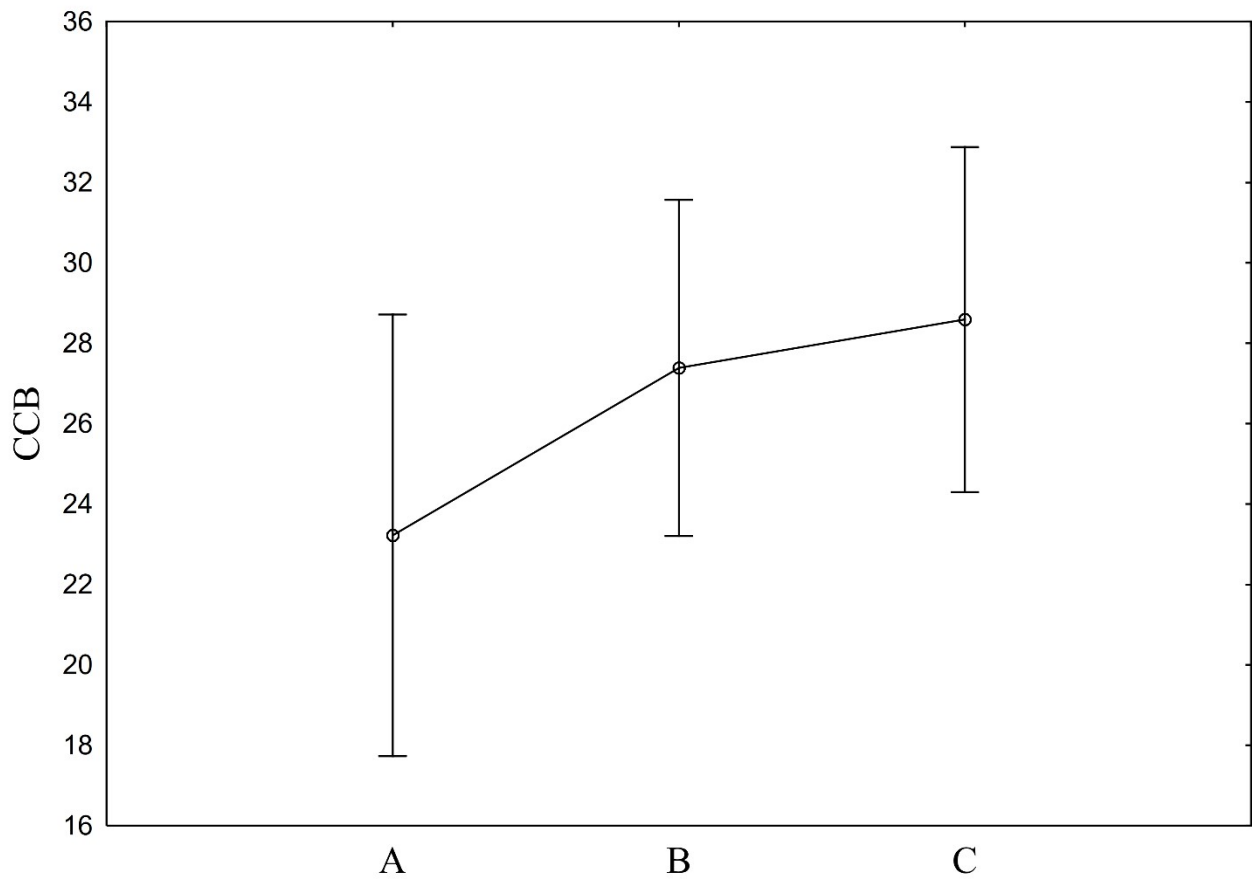

54

55 **Supplemental Figure 2: Crypt cell proliferation (CB1) at the end of trial in groups A, B and C**

56 Bars denote 95% confidence intervals. A, 0 g of GF daily; B, 3 g of GF daily; C, 6 g of GF daily.

57 Crypt cell proliferation index was determined with anti-Cyclin B1 Ab-4 antibody (Clone GNS11,

58 REF: MS-869-P1, NeoMarkers Inc., Fremont, CA. Diluted 1:100). The results were reported as

59 percentage of proliferating Cyclin B1+ crypt cells. Measurements were independent of clinical

60 information.

61

62

63

64

65

66

67

68

69

70

# Online Supporting Material

71

72

73 a)

Current effect:  $F(2, 43)=7.1268, p=.00212$

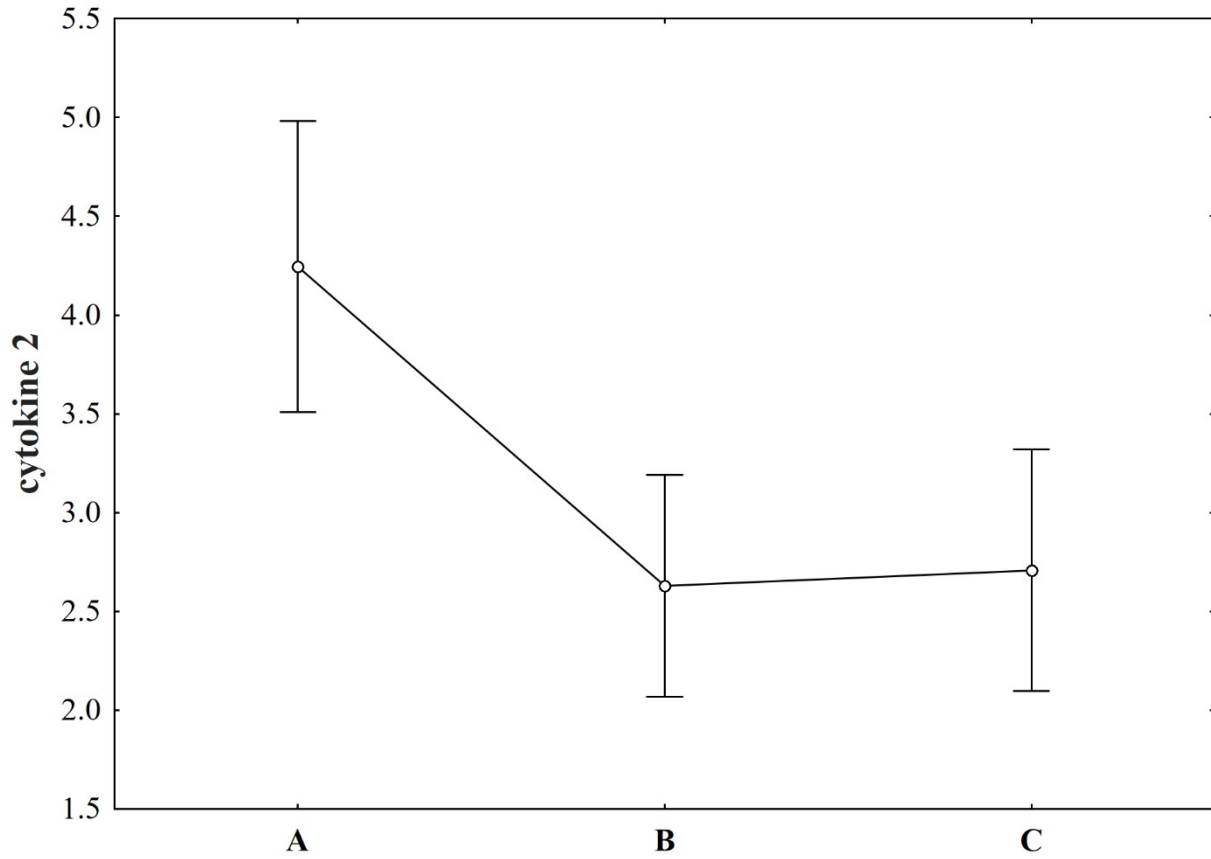

74

75

76

77

78

79

80

81

82

83

84

85

86

87

88

89

90

91

92

93

94

95

Online Supporting Material

96  
97  
98  
99  
100 b)  
101  
102  
103  
104

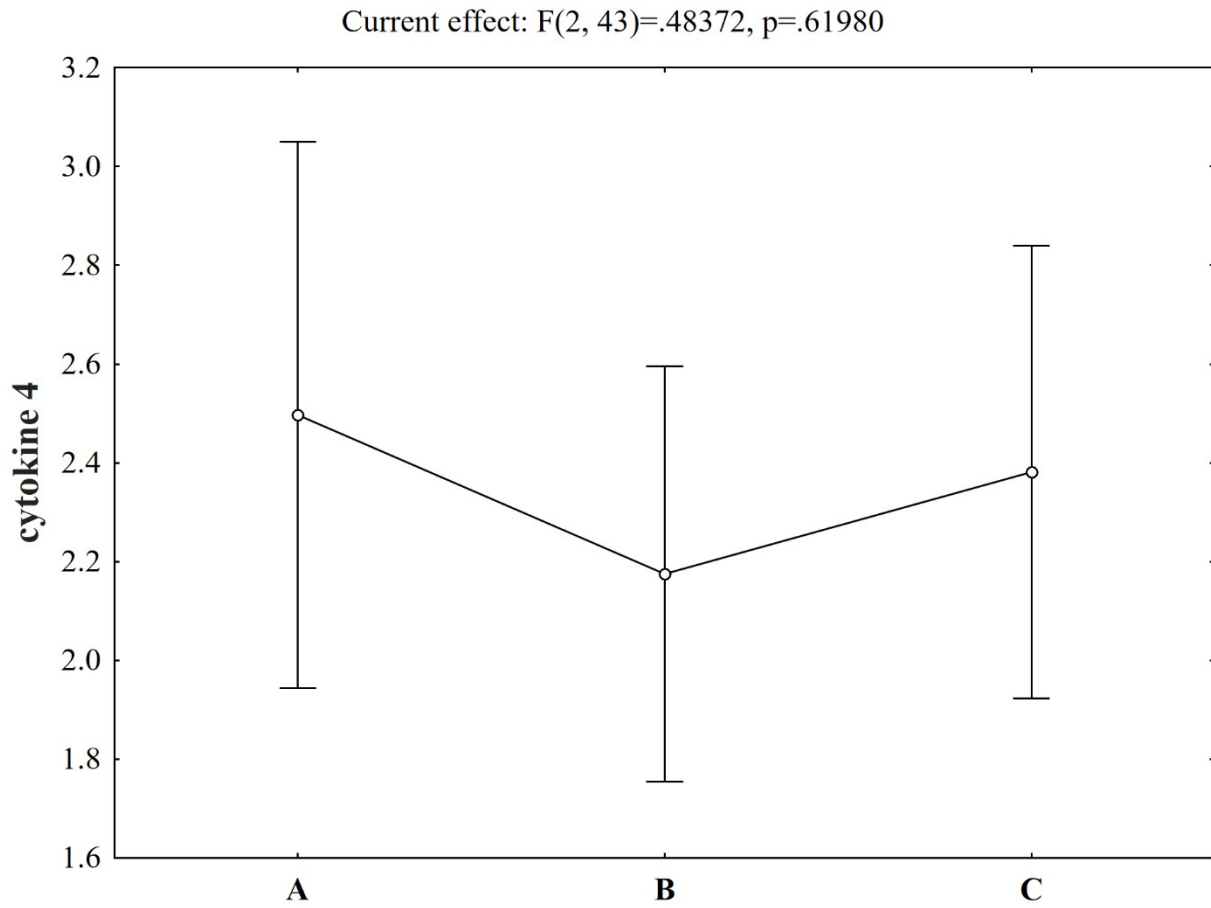

105  
106  
107  
108  
109  
110  
111  
112  
113  
114  
115  
116  
117  
118  
119  
120  
121

# Online Supporting Material

122  
123  
124  
125  
126  
127  
128  
129

c)

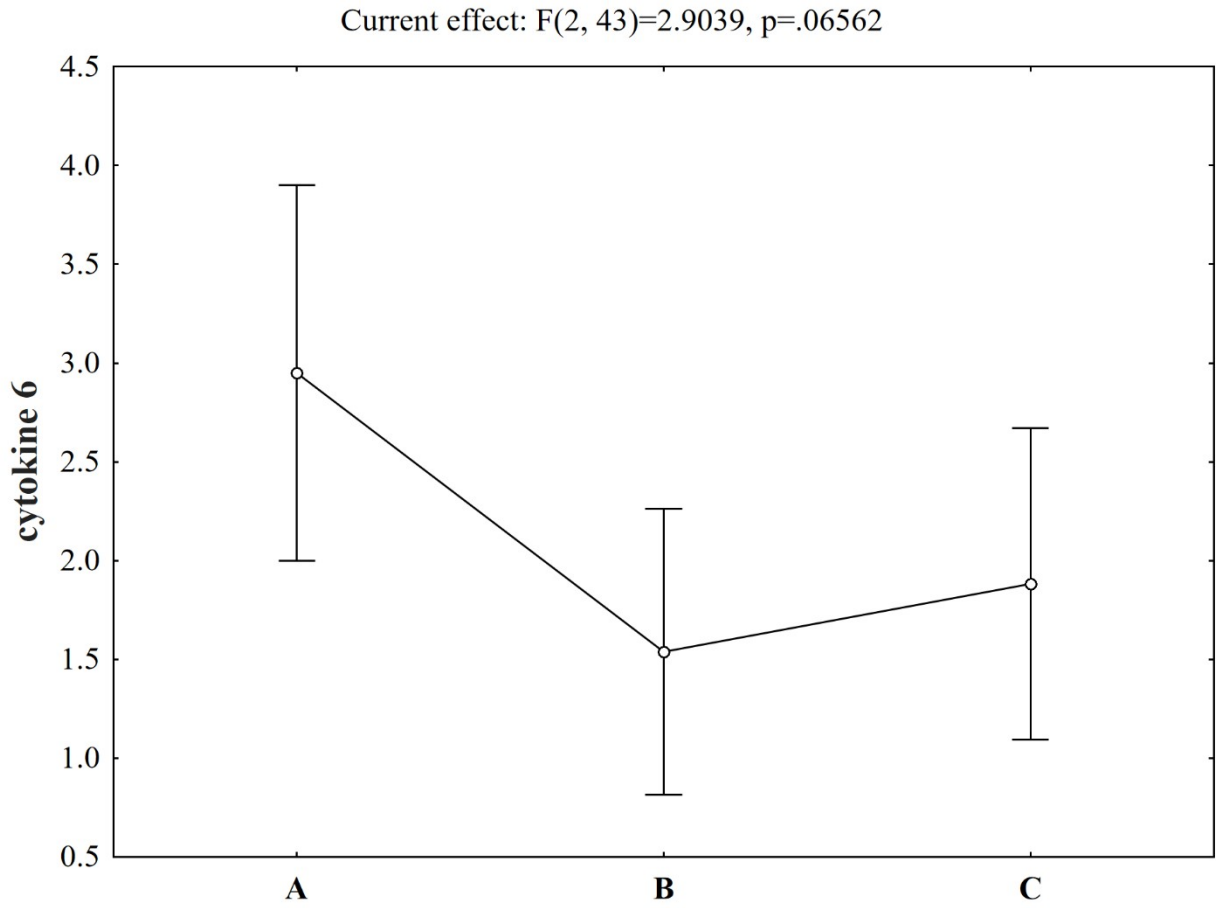

130  
131  
132  
133  
134  
135  
136  
137  
138  
139  
140  
141  
142  
143  
144  
145  
146  
147

## Online Supporting Material

148  
149  
150  
151  
152  
153  
154 d)  
155  
156  
157

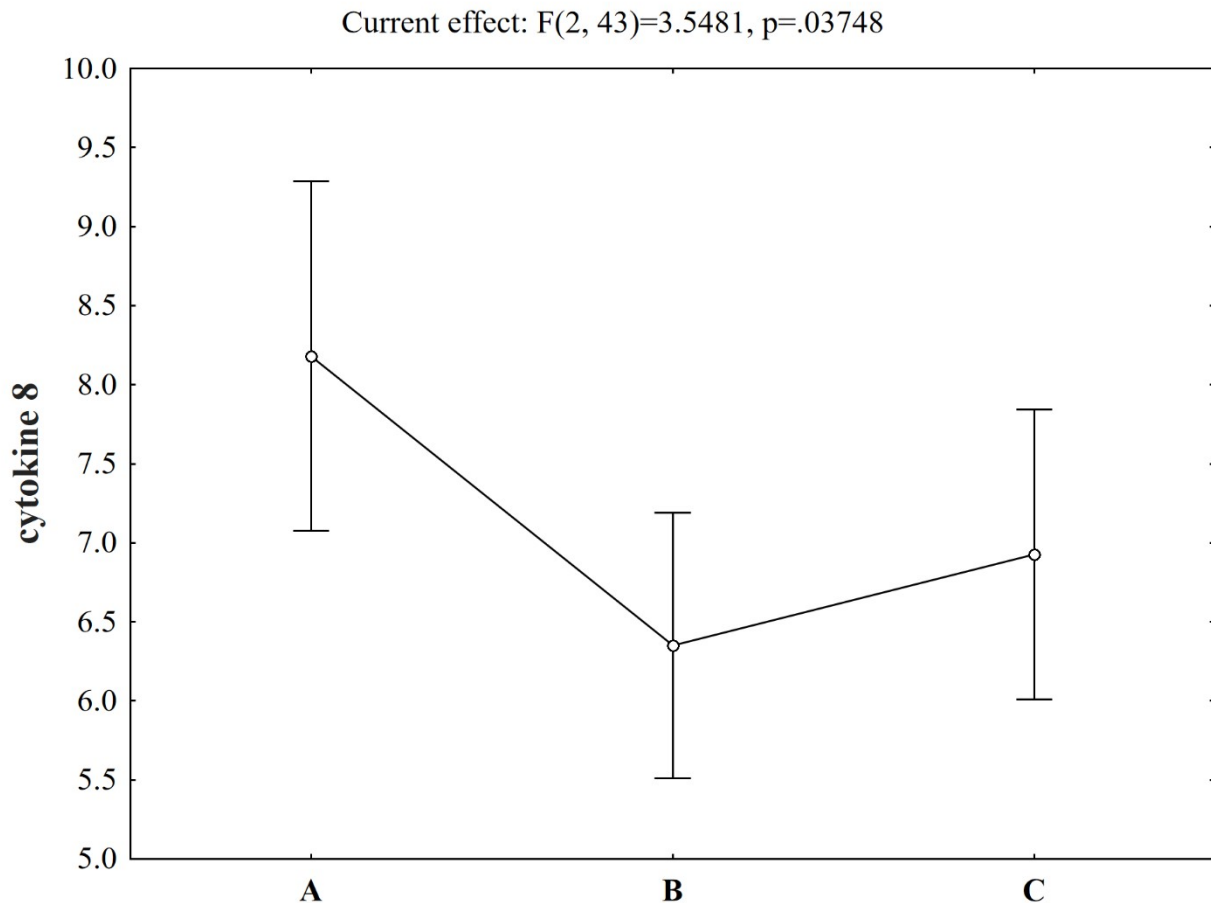

158  
159  
160 **Supplemental Figure 3: Production of Cytokine 2, 4, 6 and 8 at the end of trial in groups A, B**  
161 **and C**

162 Bars denote 95% confidence intervals. A, 0 g of GF daily; B, 3 g of GF daily; C, 6 g of GF daily. a)  
163 cytokine 2; b) cytokine 4; c) cytokine 6; d) cytokine 8. The premixed multiplex beads of the Bio-Plex  
164 human cytokine Human 27-Plex Panel (Bio-Rad Laboratories, Milan, Italy) was used in presence of  
165 30  $\mu$ l of plasma. All the plasma samples and standards were run in duplicate, and fluorescent signals  
166 were read by using Biorad 200 system (Bio-Rad). Cytokines were analyzed by means of one-way  
167 analysis of variance (ANOVA) and Tukey's test, or through the nonparametric test of Friedman if  
168 data distribution did not show a normal trend. The critical level of P was set to 0.05

169

# Online Supporting Material

170  
171 a)  
172  
173  
174

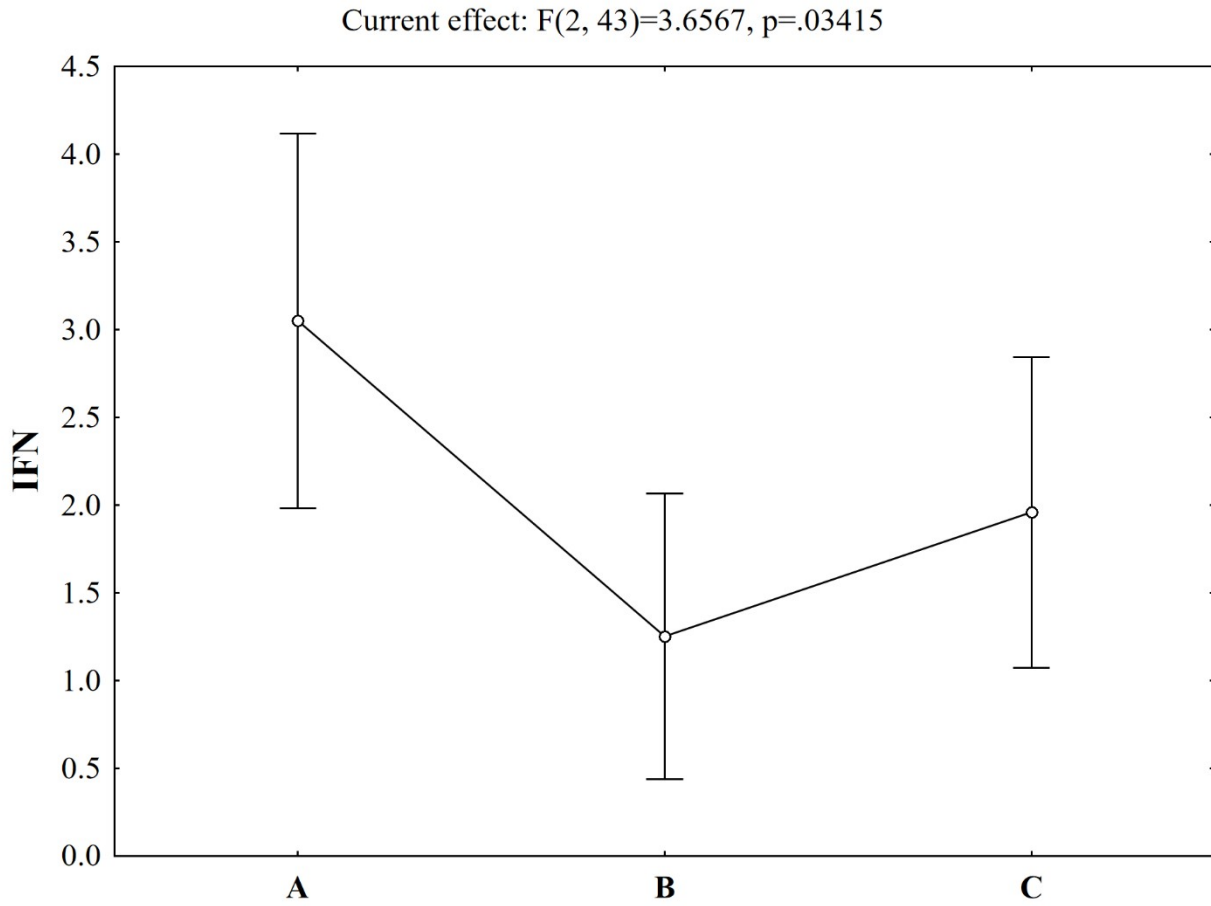

175  
176  
177  
178  
179  
180  
181  
182  
183  
184  
185  
186  
187  
188  
189  
190  
191  
192  
193  
194  
195



## Online Supporting Material

196  
197  
198  
199 b)  
200

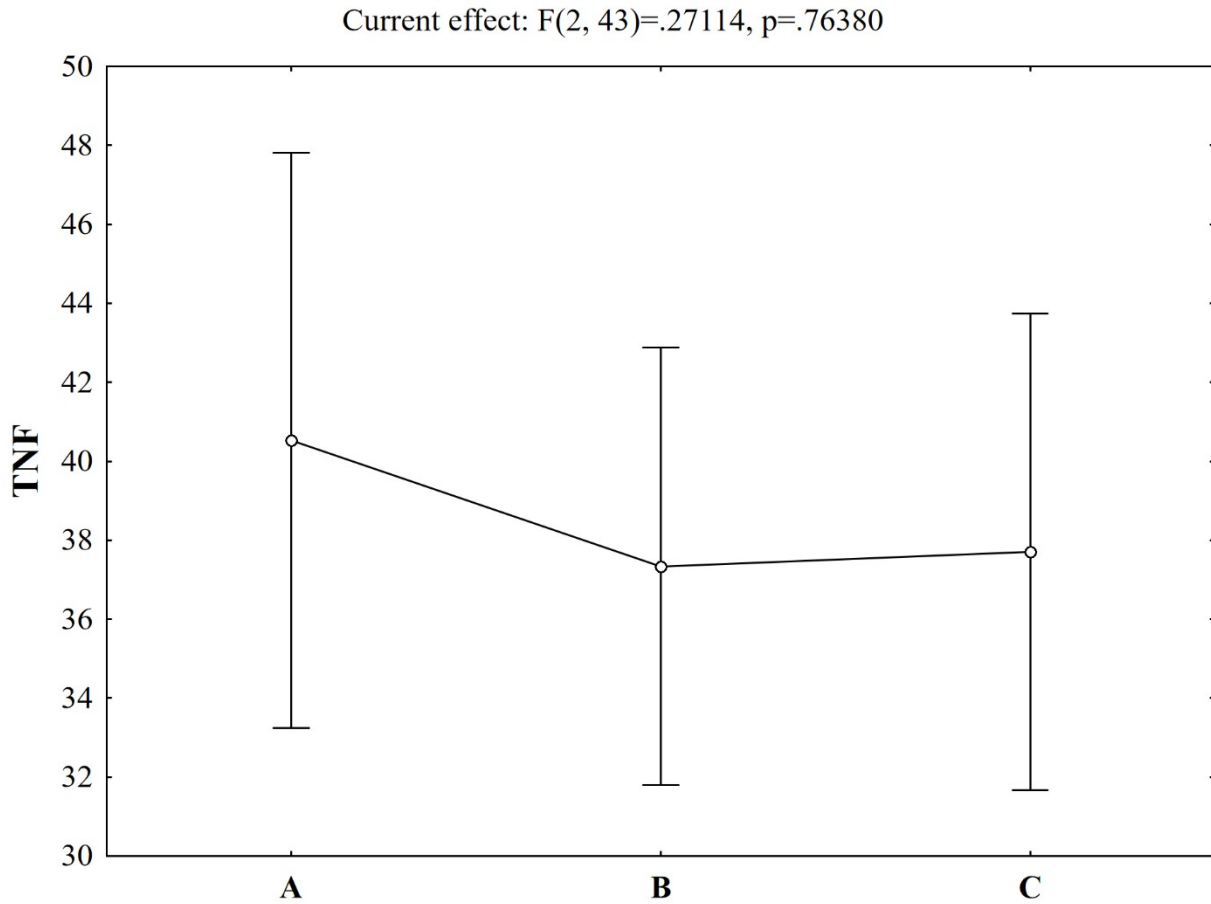

201  
202  
203 **Supplemental Figure 4: Production of IFN and TNF at the end of trial in groups A, B and C;**  
204 Bars denote 95% confidence intervals. A, 0 g of GF daily; B, 3 g of GF daily; C, 6 g of GF daily. a)  
205 IFN; b) TNF. The premixed multiplex beads of the Bio-Plex human cytokine Human 27-Plex Panel  
206 (Bio-Rad Laboratories, Milan, Italy) was used in presence of 30  $\mu$ l of plasma. All the plasma samples  
207 and standards were run in duplicate and fluorescent signals were read by using Biorad 200 system  
208 (Bio-Rad). Cytokines were analyzed by means of one-way analysis of variance (ANOVA) and  
209 Tukey's test, or through the nonparametric test of Friedman if data distribution did not show a normal  
210 trend. The critical level of P was set to 0.05.

211  
212  
213  
214  
215  
216  
217

218  
219  
220  
221

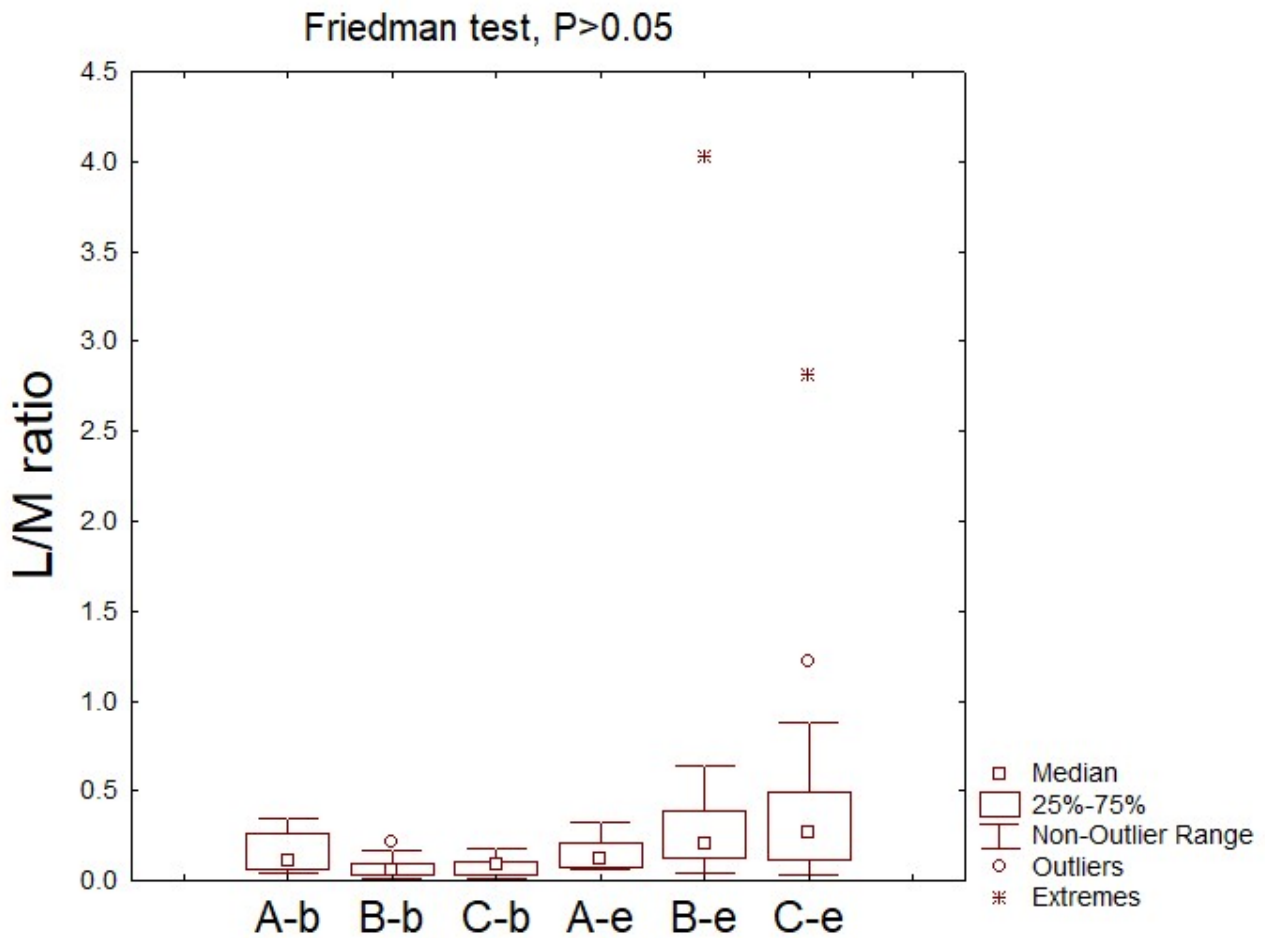

222  
223  
224  
225

226 **Supplemental Figure 5: Lactulose/Mannitol ratio in groups A, B and C.**

227 A, 0 g of GF daily; B, 3 g of GF daily; C, 6 g of GF daily. Data were expressed as the ratio between  
228 the concentration of Lactulose [mg/L] and Mannitol [mg/L]; the letters b and e stand for before and  
229 at the end of the trial.

230 Gut permeability was analyzed by the nonparametric test of Friedman. The critical level of P was  
231 set to 0.05.

232  
233  
234  
235  
236  
237  
238  
239

240

## Online Supporting Material

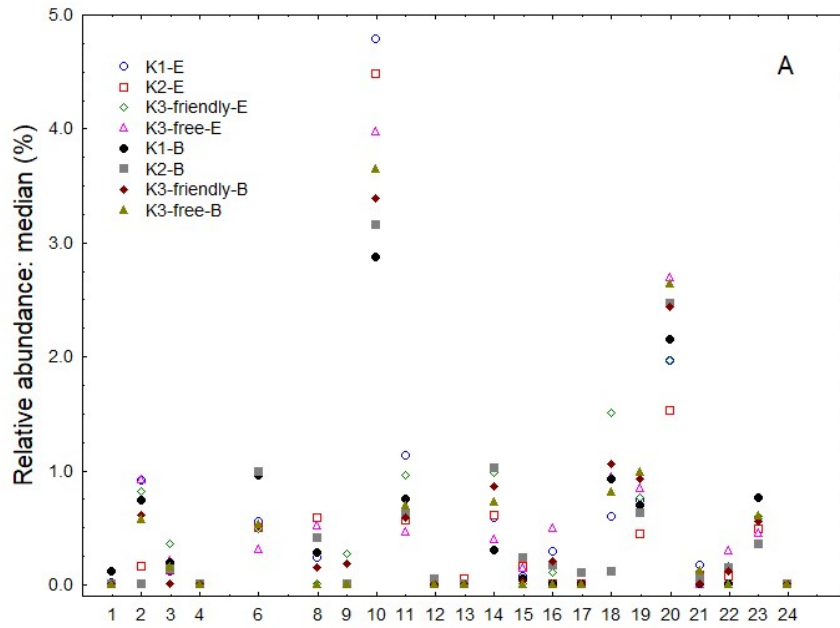

241  
242

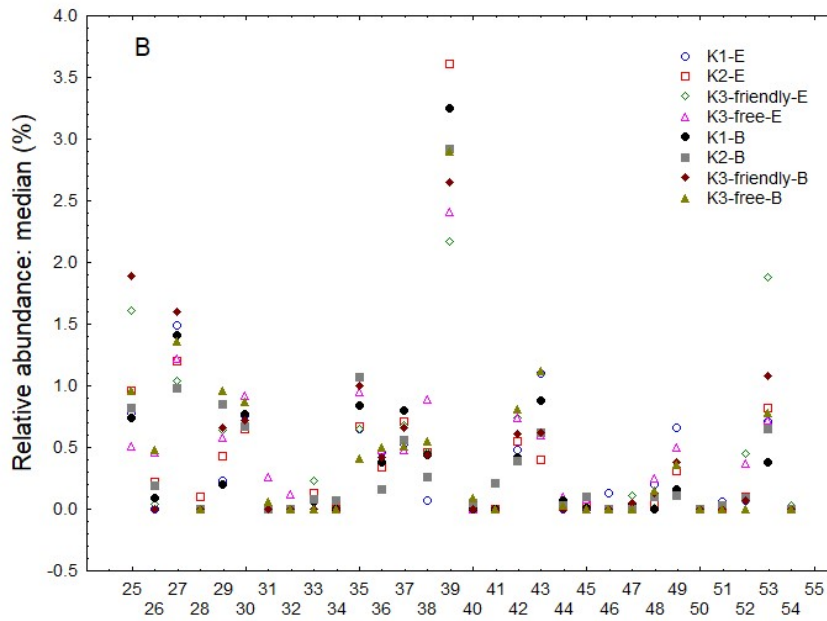

243  
244

245 **Supplemental Figure 6:** Overview of some representative genera in cluster 1 (K1), cluster 2 (K3),  
246 subjects of cluster 3 receiving Gluten Friendly (K3-friendly) and subjects of cluster 3 receiving  
247 Gluten free (K3-free). The letters E and B indicate the end of the trial or the baseline (beginning)  
248 The scatter plot represents the median of each group. For the meaning of the number see supplemental  
249 table S5

250

251

## Online Supporting Material

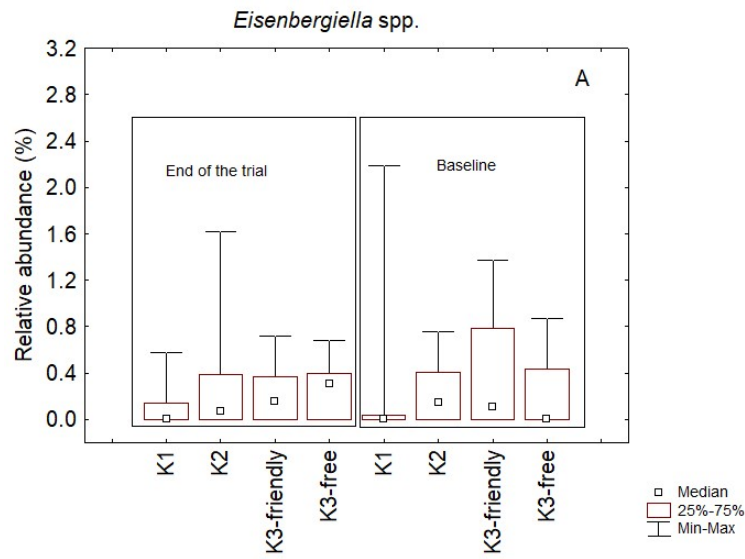

252

253

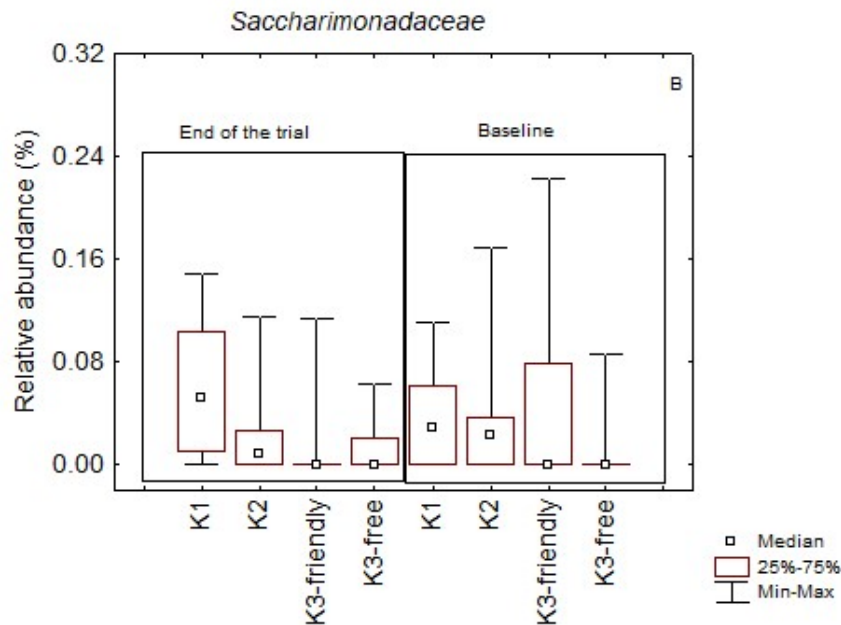

254

255 **Supplemental Figure 7:** Overview of *Eisenbergiella* (A) and *Saccharimonadaceae* (B) in cluster 1  
256 (K1), cluster 2 (K3), subjects of cluster 3 receiving Gluten Friendly (K3-friendly) and subjects of  
257 cluster 3 receiving Gluten free (K3-free) at the baseline and after the trial.

258 The box accounts for the interquartile range (from quartile 1 to quartile 3; 25-75%), while the  
259 whiskers indicate the minimum and the maximum of the population.

260

Online Supporting Material

261  
262  
263  
264  
265  
266  
267  
268  
269  
270  
271

**SUPPLEMENTAL TABLES**

**Supplemental Table 1: Gluten Friendly does not induce Gastrointestinal Symptom**

Gastrointestinal Symptom Rating Scale (GSRS) and Bristol Stool Chart. Median and quartiles are shown in brackets.

|                     | <b>Week 1</b> | <b>Week 2</b> | <b>Week 4</b> | <b>Week 8</b> | <b>Week 12</b> |
|---------------------|---------------|---------------|---------------|---------------|----------------|
| <b>Group A</b>      |               |               |               |               |                |
| Bristol Stool Chart | 3.5 (3-4)     | 4 (4-4)       | 4 (4-4)       | 4 (3.5-4)     | 4 (3-4)        |
| Abdominal pain      | 0 (0-0)       | 0 (0-0)       | 0 (0-0)       | 0 (0-0)       | 0 (0-0)        |
| Bloating            | 0 (0-0)       | 0 (0-0)       | 0 (0-0)       | 0 (0-0)       | 0 (0-0)        |
| Flatulence          | 0 (0-0)       | 0 (0-0)       | 0 (0-0)       | 0 (0-0)       | 0 (0-0)        |
| <b>Group B</b>      |               |               |               |               |                |
| Bristol Stool Chart | 3.5 (2.75-4)  | 3.5 (2.5-4)   | 4 (3-4)       | 3.5 (3-4)     | 3.5 (3-4)      |
| Abdominal pain      | 0 (0-0)       | 0 (0-0)       | 0 (0-0)       | 0 (0-0)       | 0 (0-0)        |
| Bloating            | 0 (0-0)       | 0 (0-0)       | 0 (0-0)       | 0 (0-0)       | 0 (0-0)        |
| Flatulence          | 0 (0-0)       | 0 (0-0)       | 0 (0-0)       | 0 (0-0)       | 0 (0-0)        |
| <b>Group C</b>      |               |               |               |               |                |
| Bristol Stool Chart | 3.75 (3-4)    | 4 (3-4)       | 3.5 (3-4)     | 4 (3-4)       | 4 (3.38-4)     |
| Abdominal pain      | 0 (0-0)       | 0 (0-0)       | 0 (0-0)       | 0 (0-0)       | 0 (0-0)        |
| Bloating            | 0 (0-0)       | 0 (0-0)       | 0 (0-0)       | 0 (0-0)       | 0 (0-0)        |
| Flatulence          | 0 (0-0)       | 0 (0-0)       | 0 (0-0)       | 0 (0-0)       | 0 (0-0)        |

272  
273  
274  
275  
276  
277  
278  
279  
280

Online Supporting Material

281  
282  
283  
284  
285  
286  
287  
288  
289  
290  
291  
292  
293  
294  
295  
296  
297  
298  
299  
300  
301  
302  
303  
304  
305  
306  
307  
308  
309  
310  
311  
312  
313  
314  
315  
316  
317  
318  
319  
320  
321  
322  
323  
324

**Supplemental Table 2: Mean values of the categorical predictors of k-means**

|               | <b>K1</b> | <b>K2</b> | <b>K3</b> |
|---------------|-----------|-----------|-----------|
| <b>VH/CrD</b> | -1.07     | -1.28     | -0.10     |
| <b>IEL</b>    | 97.80     | 46.22     | 13.52     |
| <b>G12</b>    | 53        | 27        | 9         |
| <b>CB1</b>    | 16.88     | 20.01     | -3.12     |
| <b>MUC2</b>   | -13.15    | -23.80    | 15.23     |

VH, VH/CrD  
IEL, IEL increase (%)  
G12, detection of 33-mer peptide (%)  
CB1, increase of CB1 (%)  
MUC2, increase of MUC2 (%)

325  
326  
327  
328

**Supplemental Table 3: Subjects included in the clusters of k-means**

| <b>K 1</b><br>15 individuals:<br>7 from C<br>6 from B<br>2 from A | <b>K 2</b><br>11 individuals:<br>5 from C<br>6 from B | <b>K3</b><br>22 individuals:<br>6 from C<br>7 from B<br>9 from A |
|-------------------------------------------------------------------|-------------------------------------------------------|------------------------------------------------------------------|
| 1C                                                                | 4C                                                    | 5C                                                               |
| 2C                                                                | 7C                                                    | 6C                                                               |
| 3C                                                                | 8C                                                    | 10C                                                              |
| 9C                                                                | 12C                                                   | 11C                                                              |
| 13C                                                               | 18C                                                   | 15C                                                              |
| 14C                                                               | 3B                                                    | 16C                                                              |
| 17C                                                               | 5B                                                    | 1B                                                               |
| 2B                                                                | 7B                                                    | 6B                                                               |
| 4B                                                                | 17B                                                   | 9B                                                               |
| 8B                                                                | 18B                                                   | 13B                                                              |
| 10B                                                               | 19B                                                   | 14B                                                              |
| 11B                                                               |                                                       | 15B                                                              |
| 12B                                                               |                                                       | 16B                                                              |
| 2A                                                                |                                                       | 1A                                                               |
| 3A                                                                |                                                       | 4A                                                               |
|                                                                   |                                                       | 5A                                                               |
|                                                                   |                                                       | 6A                                                               |
|                                                                   |                                                       | 7A                                                               |
|                                                                   |                                                       | 8A                                                               |
|                                                                   |                                                       | 9A                                                               |
|                                                                   |                                                       | 10A                                                              |
|                                                                   |                                                       | 11A                                                              |

329  
330  
331  
332  
333  
334  
335  
336  
337  
338  
339

Online Supporting Material

340  
341

342

343

344 **Supplemental Table 4: Evaluation of pro-inflammatory score at baseline**

345

**1** found  
**0** not found

***Slackia Sutterella* score (%)**

|           |   |   |     |
|-----------|---|---|-----|
| <b>K1</b> | 1 | 1 | 100 |
| <b>K1</b> | 0 | 1 | 50  |
| <b>K1</b> | 0 | 1 | 50  |
| <b>K1</b> | 0 | 1 | 50  |
| <b>K1</b> | 0 | 0 | 0   |
| <b>K1</b> | 0 | 0 | 0   |
| <b>K1</b> | 0 | 1 | 50  |
| <b>K1</b> | 0 | 1 | 50  |
| <b>K1</b> | 0 | 1 | 50  |
| <b>K1</b> | 1 | 1 | 100 |
| <b>K1</b> | 0 | 0 | 0   |
| <b>K1</b> | 0 | 0 | 0   |

**500**

***Slackia Sutterella* score (%)**

|           |   |   |     |
|-----------|---|---|-----|
| <b>K2</b> | 1 | 1 | 100 |
| <b>K2</b> | 0 | 0 | 0   |
| <b>K2</b> | 1 | 0 | 50  |
| <b>K2</b> | 0 | 0 | 0   |
| <b>K2</b> | 1 | 1 | 100 |
| <b>K2</b> | 1 | 0 | 50  |
| <b>K2</b> | 0 | 1 | 50  |
| <b>K2</b> | 0 | 0 | 0   |
| <b>K2</b> | 0 | 0 | 0   |
| <b>K2</b> | 0 | 1 | 50  |

**400**

***Slackia Sutterella* score (%)**

|                    |   |   |    |
|--------------------|---|---|----|
| <b>K3 Friendly</b> | 1 | 0 | 50 |
| <b>K3 Friendly</b> | 0 | 1 | 50 |
| <b>K3 Friendly</b> | 0 | 1 | 50 |
| <b>K3 Friendly</b> | 0 | 0 | 0  |
| <b>K3 Friendly</b> | 0 | 0 | 0  |
| <b>K3 Friendly</b> | 0 | 0 | 0  |
| <b>K3 Friendly</b> | 0 | 0 | 0  |
| <b>K3 Friendly</b> | 0 | 0 | 0  |
| <b>K3 Friendly</b> | 0 | 0 | 0  |
| <b>K3 Friendly</b> | 0 | 0 | 0  |
| <b>K3 Friendly</b> | 0 | 0 | 0  |



|                    |   |   |   |
|--------------------|---|---|---|
| <b>K3 Friendly</b> | 0 | 0 | 0 |
| <b>K3 Friendly</b> | 1 | 0 | 0 |

**150**

***Slackia Sutterella* score (%)**

|                |   |   |    |
|----------------|---|---|----|
| <b>K3 free</b> | 0 | 0 | 0  |
| <b>K3 free</b> | 0 | 1 | 50 |
| <b>K3 free</b> | 0 | 0 | 0  |
| <b>K3 free</b> | 0 | 0 | 0  |
| <b>K3 free</b> | 0 | 0 | 0  |
| <b>K3 free</b> | 0 | 1 | 50 |
| <b>K3 free</b> | 0 | 0 | 0  |

**100**

346

|                    | <b>individuals</b> | <b>sum of scores</b> | <b>standaradized score</b> |
|--------------------|--------------------|----------------------|----------------------------|
| <b>K 1</b>         | 12                 | 500                  | 41.67                      |
| <b>K 2</b>         | 10                 | 400                  | 40.00                      |
| <b>K3 Friendly</b> | 13                 | 150                  | 11.54                      |
| <b>K3 free</b>     | 7                  | 100                  | 14.29                      |

347

348

349

350

351

## Online Supporting Material

352

353

354 **Supplemental Table 5: Relative abundance of some target genera at the baseline and the end of the trial in cluster 1 (K1), cluster 2 (K3),**  
 355 **subjects of cluster 3 receiving Gluten Friendly (K3-friendly) and subjects of cluster 3 receiving Gluten free (K3-free).**

356 The letters E and B indicate the end of the trial or the baseline (beginning). 1Q: quartile 1; 3Q; quartile 3. The numbers on the first row should be used  
 357 to read figures in S6

|                      |        | 1                 | 2                      | 3                  | 4              | 5                  | 6                  | 8                    | 9                     | 10               | 11                     | 12                  | 13                   | 14                   | 15                                   | 16                               |
|----------------------|--------|-------------------|------------------------|--------------------|----------------|--------------------|--------------------|----------------------|-----------------------|------------------|------------------------|---------------------|----------------------|----------------------|--------------------------------------|----------------------------------|
|                      |        | <i>Sutterella</i> | <i>Bifidobacterium</i> | <i>Collinsella</i> | <i>Slackia</i> | <i>Bacteroides</i> | <i>Barnesiella</i> | <i>Butyrivimonas</i> | <i>Paraprevotella</i> | <i>Alistipes</i> | <i>Parabacteroides</i> | <i>Enterococcus</i> | <i>Lactobacillus</i> | <i>Streptococcus</i> | <i>Christensenellaceae R-7 group</i> | <i>Clostridium sensu stricto</i> |
| <b>K1-E</b>          | median | 0.019             | 0.918                  | 0.110              | 0.000          | 21.912             | 0.552              | 0.232                | 0.000                 | 4.790            | 1.135                  | 0.003               | 0.000                | 0.586                | 0.066                                | 0.293                            |
|                      | 1Q     | 0.000             | 0.548                  | 0.000              | 0.000          | 11.372             | 0.005              | 0.000                | 0.000                 | 1.992            | 0.573                  | 0.000               | 0.000                | 0.362                | 0.000                                | 0.000                            |
|                      | 3Q     | 0.261             | 1.363                  | 0.349              | 0.319          | 36.752             | 2.129              | 0.706                | 0.566                 | 7.380            | 1.437                  | 0.399               | 0.000                | 0.875                | 0.330                                | 0.632                            |
|                      | min    | 0.000             | 0.105                  | 0.000              | 0.000          | 7.379              | 0.000              | 0.000                | 0.000                 | 0.000            | 0.157                  | 0.000               | 0.000                | 0.183                | 0.000                                | 0.000                            |
|                      | max    | 2.037             | 2.227                  | 0.566              | 0.503          | 55.692             | 11.453             | 1.431                | 2.503                 | 13.784           | 2.405                  | 0.801               | 0.016                | 1.400                | 0.538                                | 0.954                            |
| <b>K2-E</b>          | median | 0.000             | 0.153                  | 0.125              | 0.000          | 19.367             | 0.496              | 0.589                | 0.000                 | 4.477            | 0.567                  | 0.006               | 0.045                | 0.603                | 0.154                                | 0.000                            |
|                      | 1Q     | 0.000             | 0.000                  | 0.000              | 0.000          | 16.854             | 0.000              | 0.000                | 0.000                 | 1.312            | 0.181                  | 0.000               | 0.000                | 0.466                | 0.000                                | 0.000                            |
|                      | 3Q     | 0.561             | 0.782                  | 0.460              | 0.328          | 38.095             | 4.039              | 0.842                | 0.546                 | 7.065            | 0.794                  | 0.275               | 0.181                | 1.116                | 0.468                                | 0.762                            |
|                      | min    | 0.000             | 0.000                  | 0.000              | 0.000          | 0.000              | 0.000              | 0.000                | 0.000                 | 0.000            | 0.000                  | 0.000               | 0.000                | 0.071                | 0.000                                | 0.000                            |
|                      | max    | 1.425             | 5.184                  | 1.082              | 0.641          | 55.826             | 9.475              | 1.017                | 3.550                 | 14.992           | 1.940                  | 0.816               | 1.684                | 3.101                | 1.096                                | 1.632                            |
| <b>K3-friendly-E</b> | median | 0.000             | 0.815                  | 0.350              | 0.000          | 23.215             | 0.485              | 0.000                | 0.272                 | 3.155            | 0.956                  | 0.020               | 0.000                | 0.982                | 0.000                                | 0.103                            |
|                      | 1Q     | 0.000             | 0.336                  | 0.000              | 0.000          | 12.690             | 0.018              | 0.000                | 0.000                 | 1.579            | 0.247                  | 0.000               | 0.000                | 0.552                | 0.000                                | 0.000                            |
|                      | 3Q     | 0.025             | 1.420                  | 0.697              | 0.000          | 38.299             | 1.817              | 0.316                | 1.120                 | 4.962            | 1.382                  | 0.420               | 0.178                | 1.239                | 0.400                                | 0.856                            |
|                      | min    | 0.000             | 0.000                  | 0.000              | 0.000          | 7.908              | 0.000              | 0.000                | 0.000                 | 0.000            | 0.000                  | 0.000               | 0.000                | 0.249                | 0.000                                | 0.000                            |
|                      | max    | 0.472             | 6.231                  | 1.324              | 0.287          | 50.604             | 8.446              | 0.817                | 4.336                 | 18.396           | 1.979                  | 2.096               | 0.739                | 3.133                | 1.955                                | 1.123                            |
| <b>K3-free-E</b>     | median | 0.000             | 0.925                  | 0.215              | 0.000          | 15.919             | 0.307              | 0.520                | 0.000                 | 3.979            | 0.462                  | 0.000               | 0.000                | 0.394                | 0.149                                | 0.502                            |
|                      | 1Q     | 0.000             | 0.611                  | 0.000              | 0.000          | 13.696             | 0.000              | 0.000                | 0.000                 | 3.073            | 0.156                  | 0.000               | 0.000                | 0.238                | 0.048                                | 0.000                            |
|                      | 3Q     | 0.000             | 1.333                  | 0.578              | 0.000          | 21.292             | 2.129              | 0.741                | 0.000                 | 6.774            | 0.804                  | 0.182               | 0.000                | 1.824                | 0.772                                | 0.990                            |
|                      | min    | 0.000             | 0.000                  | 0.000              | 0.000          | 13.517             | 0.000              | 0.000                | 0.000                 | 2.840            | 0.000                  | 0.000               | 0.000                | 0.226                | 0.000                                | 0.000                            |
|                      | max    | 1.071             | 2.634                  | 0.579              | 0.000          | 56.335             | 2.183              | 1.096                | 0.336                 | 9.037            | 0.962                  | 0.298               | 0.045                | 2.490                | 1.092                                | 1.274                            |
| <b>K1-B</b>          | median | 0.113             | 0.738                  | 0.187              | 0.000          | 21.970             | 0.962              | 0.278                | 0.000                 | 2.875            | 0.751                  | 0.000               | 0.000                | 0.304                | 0.052                                | 0.000                            |
|                      | 1Q     | 0.000             | 0.193                  | 0.000              | 0.000          | 12.620             | 0.006              | 0.000                | 0.000                 | 2.061            | 0.238                  | 0.000               | 0.000                | 0.154                | 0.000                                | 0.000                            |
|                      | 3Q     | 0.466             | 1.113                  | 0.308              | 0.000          | 37.742             | 1.614              | 0.477                | 0.612                 | 3.645            | 0.839                  | 0.040               | 0.033                | 0.711                | 0.256                                | 0.326                            |
|                      | min    | 0.000             | 0.000                  | 0.000              | 0.000          | 9.057              | 0.000              | 0.000                | 0.000                 | 0.383            | 0.048                  | 0.000               | 0.000                | 0.000                | 0.000                                | 0.000                            |
|                      | max    | 0.699             | 3.071                  | 0.443              | 0.411          | 57.927             | 2.212              | 1.226                | 1.876                 | 5.013            | 1.098                  | 1.159               | 0.544                | 1.070                | 2.541                                | 1.138                            |
| <b>K2-B</b>          | median | 0.000             | 0.000                  | 0.140              | 0.000          | 24.301             | 0.989              | 0.407                | 0.000                 | 3.157            | 0.623                  | 0.048               | 0.000                | 1.027                | 0.232                                | 0.171                            |
|                      | 1Q     | 0.000             | 0.000                  | 0.000              | 0.000          | 13.245             | 0.000              | 0.000                | 0.000                 | 1.040            | 0.096                  | 0.000               | 0.000                | 0.276                | 0.000                                | 0.000                            |
|                      | 3Q     | 0.390             | 0.588                  | 0.254              | 0.327          | 32.074             | 2.099              | 0.803                | 0.298                 | 5.195            | 0.907                  | 0.311               | 0.032                | 1.653                | 0.974                                | 0.362                            |
|                      | min    | 0.000             | 0.000                  | 0.000              | 0.000          | 5.045              | 0.000              | 0.000                | 0.000                 | 0.118            | 0.008                  | 0.000               | 0.000                | 0.000                | 0.000                                | 0.000                            |
|                      | max    | 0.669             | 0.667                  | 1.127              | 1.275          | 39.512             | 3.581              | 1.943                | 2.089                 | 6.372            | 1.769                  | 0.835               | 0.652                | 3.958                | 2.242                                | 0.593                            |
| <b>K3-friendly-B</b> | median | 0.000             | 0.605                  | 0.000              | 0.000          | 24.406             | 0.513              | 0.150                | 0.180                 | 3.388            | 0.584                  | 0.000               | 0.000                | 0.859                | 0.022                                | 0.197                            |
|                      | 1Q     | 0.000             | 0.069                  | 0.000              | 0.000          | 14.662             | 0.000              | 0.000                | 0.000                 | 2.032            | 0.080                  | 0.000               | 0.000                | 0.447                | 0.000                                | 0.000                            |
|                      | 3Q     | 0.000             | 0.873                  | 0.424              | 0.000          | 30.005             | 1.020              | 0.725                | 0.581                 | 5.910            | 0.773                  | 0.191               | 0.044                | 2.236                | 0.153                                | 1.005                            |
|                      | min    | 0.000             | 0.000                  | 0.000              | 0.000          | 7.401              | 0.000              | 0.000                | 0.000                 | 0.134            | 0.000                  | 0.000               | 0.000                | 0.000                | 0.000                                | 0.000                            |
|                      | max    | 0.493             | 1.850                  | 0.788              | 0.531          | 36.979             | 4.340              | 1.221                | 9.831                 | 8.455            | 2.193                  | 0.801               | 1.548                | 9.434                | 0.920                                | 1.878                            |
| <b>K3-free-B</b>     | median | 0.000             | 0.575                  | 0.161              | 0.000          | 22.024             | 0.532              | 0.000                | 0.000                 | 3.645            | 0.695                  | 0.000               | 0.000                | 0.729                | 0.000                                | 0.000                            |
|                      | 1Q     | 0.000             | 0.371                  | 0.134              | 0.000          | 19.471             | 0.000              | 0.000                | 0.000                 | 2.952            | 0.401                  | 0.000               | 0.000                | 0.386                | 0.000                                | 0.000                            |
|                      | 3Q     | 0.015             | 0.998                  | 0.328              | 0.000          | 33.458             | 0.790              | 0.819                | 0.000                 | 3.992            | 0.891                  | 0.560               | 0.071                | 1.189                | 0.197                                | 0.051                            |
|                      | min    | 0.000             | 0.311                  | 0.000              | 0.000          | 13.038             | 0.000              | 0.000                | 0.000                 | 1.502            | 0.030                  | 0.000               | 0.000                | 0.000                | 0.000                                | 0.000                            |
|                      | max    | 0.365             | 1.819                  | 0.431              | 0.000          | 54.808             | 2.086              | 1.139                | 0.580                 | 4.992            | 1.256                  | 0.721               | 0.542                | 2.354                | 0.488                                | 0.451                            |

358

359

|                      | 17               | 18                  | 19                  | 20             | 21                    | 22                    | 23                      | 24                | 25                       | 26                 | 27               | 28                 | 29                                | 30                 | 31                              | 32    | 33    |
|----------------------|------------------|---------------------|---------------------|----------------|-----------------------|-----------------------|-------------------------|-------------------|--------------------------|--------------------|------------------|--------------------|-----------------------------------|--------------------|---------------------------------|-------|-------|
|                      | <i>Ekaziella</i> | <i>Agathobacter</i> | <i>Anaerostipes</i> | <i>Blautia</i> | <i>Coproccoccus 1</i> | <i>Eisenbergiella</i> | <i>Fusicatenibacter</i> | <i>Hungatella</i> | <i>Lachnoclostridium</i> | <i>Lachnospira</i> | <i>Roseburia</i> | <i>Tyzzzeria 4</i> | <i>Eubacterium eligenes group</i> | <i>halii group</i> | <i>ntriosum grovylanophilum</i> |       |       |
| <b>K1-E</b>          | 0.000            | 0.594               | 0.738               | 1.968          | 0.171                 | 0.000                 | 0.486                   | 0.000             | 0.776                    | 0.000              | 1.487            | 0.000              | 0.228                             | 0.754              | 0.000                           | 0.000 | 0.056 |
|                      | 0.000            | 0.182               | 0.210               | 1.715          | 0.000                 | 0.000                 | 0.299                   | 0.000             | 0.257                    | 0.000              | 0.862            | 0.000              | 0.000                             | 0.592              | 0.000                           | 0.000 | 0.000 |
|                      | 0.018            | 0.782               | 1.380               | 2.925          | 0.203                 | 0.166                 | 0.951                   | 0.159             | 2.510                    | 0.357              | 1.811            | 0.121              | 1.228                             | 1.015              | 0.341                           | 0.078 | 0.494 |
|                      | 0.000            | 0.000               | 0.000               | 0.347          | 0.000                 | 0.000                 | 0.000                   | 0.000             | 0.179                    | 0.000              | 0.130            | 0.000              | 0.000                             | 0.270              | 0.000                           | 0.000 | 0.000 |
|                      | 0.062            | 1.422               | 1.738               | 3.445          | 0.332                 | 0.577                 | 1.542                   | 0.414             | 4.600                    | 1.540              | 4.789            | 0.602              | 1.825                             | 2.131              | 0.615                           | 0.466 | 0.973 |
| <b>K2-E</b>          | 0.000            | 0.119               | 0.440               | 1.531          | 0.076                 | 0.072                 | 0.491                   | 0.000             | 0.952                    | 0.214              | 1.192            | 0.091              | 0.423                             | 0.650              | 0.000                           | 0.000 | 0.127 |
|                      | 0.000            | 0.000               | 0.296               | 0.990          | 0.000                 | 0.000                 | 0.275                   | 0.000             | 0.552                    | 0.000              | 0.525            | 0.000              | 0.140                             | 0.226              | 0.000                           | 0.000 | 0.000 |
|                      | 0.036            | 0.886               | 0.991               | 2.548          | 0.239                 | 0.406                 | 0.740                   | 0.361             | 2.481                    | 0.299              | 2.190            | 0.600              | 0.661                             | 0.957              | 0.331                           | 0.143 | 0.283 |
|                      | 0.000            | 0.000               | 0.000               | 0.507          | 0.000                 | 0.000                 | 0.000                   | 0.000             | 0.254                    | 0.000              | 0.000            | 0.000              | 0.000                             | 0.000              | 0.000                           | 0.000 | 0.000 |
|                      | 0.247            | 2.248               | 2.375               | 3.513          | 0.252                 | 1.615                 | 1.293                   | 1.396             | 4.111                    | 0.408              | 5.261            | 1.563              | 2.242                             | 1.337              | 0.658                           | 0.517 | 0.569 |
| <b>K3-friendly-E</b> | 0.000            | 1.506               | 0.757               | 1.959          | 0.000                 | 0.160                 | 0.599                   | 0.000             | 1.604                    | 0.035              | 1.038            | 0.000              | 0.636                             | 0.718              | 0.000                           | 0.000 | 0.229 |
|                      | 0.000            | 0.000               | 0.607               | 1.807          | 0.000                 | 0.000                 | 0.345                   | 0.000             | 0.502                    | 0.000              | 0.613            | 0.000              | 0.121                             | 0.489              | 0.000                           | 0.000 | 0.000 |
|                      | 0.000            | 1.786               | 1.276               | 2.534          | 0.276                 | 0.372                 | 0.880                   | 0.243             | 2.478                    | 0.608              | 2.361            | 0.000              | 1.380                             | 0.964              | 0.266                           | 0.515 | 0.378 |
|                      | 0.000            | 0.000               | 0.440               | 0.686          | 0.000                 | 0.000                 | 0.000                   | 0.000             | 0.077                    | 0.000              | 0.000            | 0.000              | 0.000                             | 0.000              | 0.000                           | 0.000 | 0.000 |
|                      | 0.028            | 6.333               | 1.716               | 3.299          | 0.390                 | 0.717                 | 1.341                   | 0.409             | 2.747                    | 0.835              | 4.945            | 0.348              | 3.373                             | 1.052              | 0.625                           | 1.557 | 0.670 |
| <b>K3-free-E</b>     | 0.000            | 0.951               | 0.844               | 2.697          | 0.000                 | 0.305                 | 0.450                   | 0.000             | 0.507                    | 0.455              | 1.215            | 0.000              | 0.577                             | 0.920              | 0.260                           | 0.113 | 0.000 |
|                      | 0.000            | 0.000               | 0.671               | 2.376          | 0.000                 | 0.000                 | 0.253                   | 0.000             | 0.030                    | 0.000              | 0.618            | 0.000              | 0.000                             | 0.498              | 0.000                           | 0.000 | 0.000 |
|                      | 0.491            | 1.231               | 1.040               | 2.836          | 0.238                 | 0.392                 | 0.781                   | 0.000             | 3.490                    | 0.493              | 1.927            | 0.000              | 0.890                             | 1.326              | 0.381                           | 0.448 | 0.250 |
|                      | 0.000            | 0.000               | 0.402               | 2.081          | 0.000                 | 0.000                 | 0.000                   | 0.000             | 0.000                    | 0.000              | 0.000            | 0.000              | 0.000                             | 0.444              | 0.000                           | 0.000 | 0.000 |
|                      | 0.589            | 1.534               | 1.692               | 3.001          | 0.307                 | 0.686                 | 1.660                   | 0.220             | 4.586                    | 0.739              | 2.462            | 0.000              | 1.999                             | 1.333              | 0.811                           | 0.552 | 0.651 |
| <b>K1-B</b>          | 0.000            | 0.923               | 0.694               | 2.146          | 0.000                 | 0.000                 | 0.765                   | 0.000             | 0.734                    | 0.090              | 1.402            | 0.000              | 0.198                             | 0.766              | 0.000                           | 0.000 | 0.054 |
|                      | 0.000            | 0.449               | 0.309               | 1.593          | 0.000                 | 0.000                 | 0.339                   | 0.000             | 0.220                    | 0.000              | 0.813            | 0.000              | 0.000                             | 0.559              | 0.000                           | 0.000 | 0.000 |
|                      | 0.012            | 1.877               | 0.969               | 2.760          | 0.182                 | 0.053                 | 1.076                   | 0.000             | 3.446                    | 0.429              | 2.746            | 0.000              | 1.095                             | 0.979              | 0.340                           | 0.102 | 0.278 |
|                      | 0.000            | 0.000               | 0.000               | 0.322          | 0.000                 | 0.000                 | 0.000                   | 0.000             | 0.000                    | 0.000              | 0.000            | 0.000              | 0.000                             | 0.000              | 0.000                           | 0.000 | 0.000 |
|                      | 0.110            | 3.550               | 2.414               | 3.527          | 0.341                 | 2.183                 | 1.272                   | 1.068             | 4.111                    | 2.471              | 3.672            | 0.091              | 1.535                             | 1.512              | 0.448                           | 0.465 | 0.856 |
| <b>K2-B</b>          | 0.103            | 0.118               | 0.632               | 2.465          | 0.043                 | 0.150                 | 0.351                   | 0.000             | 0.816                    | 0.188              | 0.973            | 0.000              | 0.847                             | 0.665              | 0.000                           | 0.000 | 0.074 |
|                      | 0.000            | 0.000               | 0.210               | 2.240          | 0.000                 | 0.000                 | 0.121                   | 0.000             | 0.258                    | 0.000              | 0.636            | 0.000              | 0.354                             | 0.295              | 0.000                           | 0.000 | 0.000 |
|                      | 0.344            | 1.256               | 0.875               | 3.620          | 0.222                 | 0.428                 | 0.541                   | 0.211             | 1.391                    | 0.822              | 2.210            | 0.000              | 1.344                             | 1.027              | 0.274                           | 0.105 | 0.253 |
|                      | 0.000            | 0.000               | 0.000               | 1.723          | 0.000                 | 0.000                 | 0.000                   | 0.000             | 0.083                    | 0.000              | 0.000            | 0.000              | 0.000                             | 0.157              | 0.000                           | 0.000 | 0.000 |
|                      | 1.871            | 2.886               | 1.296               | 7.940          | 0.663                 | 0.755                 | 1.140                   | 0.833             | 5.562                    | 1.458              | 5.109            | 0.145              | 1.825                             | 1.625              | 0.549                           | 0.597 | 0.611 |
| <b>K3-friendly-B</b> | 0.000            | 1.060               | 0.929               | 2.429          | 0.000                 | 0.109                 | 0.548                   | 0.000             | 1.883                    | 0.000              | 1.599            | 0.000              | 0.654                             | 0.718              | 0.000                           | 0.000 | 0.000 |
|                      | 0.000            | 0.000               | 0.143               | 1.724          | 0.000                 | 0.000                 | 0.319                   | 0.000             | 0.647                    | 0.000              | 0.940            | 0.000              | 0.193                             | 0.312              | 0.000                           | 0.000 | 0.000 |
|                      | 0.016            | 1.221               | 1.335               | 4.677          | 0.311                 | 0.795                 | 0.868                   | 0.000             | 2.490                    | 0.201              | 2.348            | 0.000              | 1.793                             | 1.164              | 0.219                           | 0.197 | 0.112 |
|                      | 0.000            | 0.000               | 0.000               | 0.868          | 0.000                 | 0.000                 | 0.000                   | 0.000             | 0.176                    | 0.000              | 0.394            | 0.000              | 0.000                             | 0.000              | 0.000                           | 0.000 | 0.000 |
|                      | 0.320            | 1.866               | 2.144               | 6.367          | 0.542                 | 1.376                 | 0.953                   | 0.506             | 3.388                    | 1.093              | 3.393            | 0.602              | 4.393                             | 1.866              | 0.734                           | 1.067 | 0.468 |
| <b>K3-free-B</b>     | 0.000            | 0.819               | 0.988               | 2.638          | 0.127                 | 0.000                 | 0.612                   | 0.000             | 0.960                    | 0.479              | 1.357            | 0.000              | 0.954                             | 0.862              | 0.059                           | 0.000 | 0.000 |
|                      | 0.000            | 0.316               | 0.502               | 1.365          | 0.000                 | 0.000                 | 0.410                   | 0.000             | 0.438                    | 0.000              | 0.445            | 0.000              | 0.480                             | 0.709              | 0.000                           | 0.000 | 0.000 |
|                      | 0.000            | 1.271               | 1.326               | 3.848          | 0.252                 | 0.431                 | 0.641                   | 0.223             | 1.243                    | 0.740              | 2.683            | 0.000              | 1.783                             | 0.984              | 0.622                           | 0.245 | 0.262 |
|                      | 0.000            | 0.000               | 0.407               | 0.962          | 0.000                 | 0.000                 | 0.000                   | 0.000             | 0.167                    | 0.000              | 0.000            | 0.000              | 0.000                             | 0.311              | 0.000                           | 0.000 | 0.000 |
|                      | 0.066            | 1.584               | 1.942               | 4.810          | 0.309                 | 0.868                 | 1.106                   | 0.283             | 1.996                    | 0.803              | 4.844            | 0.000              | 2.193                             | 1.061              | 0.682                           | 0.299 | 0.420 |

360  
361  
362  
363  
364  
365  
366  
367  
368  
369  
370

|                      | 34                | 35                | 36                     | 37                | 38                  | 39                      | 40                    | 41                      | 42                   | 43                     | 44                    |
|----------------------|-------------------|-------------------|------------------------|-------------------|---------------------|-------------------------|-----------------------|-------------------------|----------------------|------------------------|-----------------------|
|                      | <i>R. gnnavus</i> | <i>R. torques</i> | <i>Intestinibacter</i> | <i>Romboutsia</i> | <i>Butyricoccus</i> | <i>Faecalibacterium</i> | <i>Intestinimonas</i> | <i>Negativibacillus</i> | <i>Oscillibacter</i> | <i>Subdoligranulum</i> | <i>E coproligenes</i> |
| <b>K1-E</b>          | 0.000             | 0.646             | 0.461                  | 0.529             | 0.066               | 2.915                   | 0.000                 | 0.000                   | 0.471                | 1.091                  | 0.000                 |
|                      | 0.000             | 0.261             | 0.099                  | 0.263             | 0.000               | 1.656                   | 0.000                 | 0.000                   | 0.311                | 0.786                  | 0.000                 |
|                      | 0.179             | 1.355             | 0.829                  | 1.271             | 0.304               | 3.333                   | 0.305                 | 0.000                   | 1.020                | 1.620                  | 0.155                 |
|                      | 0.000             | 0.000             | 0.000                  | 0.000             | 0.000               | 0.000                   | 0.000                 | 0.000                   | 0.000                | 0.000                  | 0.000                 |
|                      | 1.110             | 2.755             | 2.450                  | 1.427             | 1.013               | 4.322                   | 0.565                 | 0.444                   | 1.134                | 1.954                  | 1.550                 |
| <b>K2-E</b>          | 0.000             | 0.666             | 0.339                  | 0.709             | 0.459               | 3.606                   | 0.000                 | 0.000                   | 0.549                | 0.396                  | 0.017                 |
|                      | 0.000             | 0.515             | 0.000                  | 0.297             | 0.037               | 1.937                   | 0.000                 | 0.000                   | 0.296                | 0.025                  | 0.000                 |
|                      | 0.655             | 1.017             | 0.365                  | 1.217             | 0.992               | 5.470                   | 0.091                 | 0.405                   | 0.993                | 1.149                  | 0.167                 |
|                      | 0.000             | 0.000             | 0.000                  | 0.000             | 0.000               | 0.000                   | 0.000                 | 0.000                   | 0.000                | 0.000                  | 0.000                 |
|                      | 0.991             | 1.740             | 1.363                  | 1.446             | 1.048               | 8.319                   | 0.536                 | 0.431                   | 1.512                | 2.181                  | 0.748                 |
| <b>K3-friendly-E</b> | 0.000             | 0.645             | 0.385                  | 0.676             | 0.460               | 2.166                   | 0.000                 | 0.000                   | 0.734                | 0.606                  | 0.021                 |
|                      | 0.000             | 0.248             | 0.000                  | 0.083             | 0.287               | 1.244                   | 0.000                 | 0.000                   | 0.373                | 0.000                  | 0.000                 |
|                      | 0.338             | 1.034             | 0.641                  | 1.006             | 0.809               | 2.707                   | 0.204                 | 0.184                   | 1.129                | 1.324                  | 0.209                 |
|                      | 0.000             | 0.000             | 0.000                  | 0.000             | 0.000               | 0.000                   | 0.000                 | 0.000                   | 0.107                | 0.000                  | 0.000                 |
|                      | 4.861             | 1.407             | 1.069                  | 1.801             | 1.222               | 4.380                   | 0.294                 | 0.699                   | 1.968                | 2.488                  | 0.654                 |
| <b>K3-free-E</b>     | 0.000             | 0.941             | 0.478                  | 0.476             | 0.887               | 2.402                   | 0.000                 | 0.000                   | 0.737                | 0.595                  | 0.094                 |
|                      | 0.000             | 0.000             | 0.282                  | 0.382             | 0.026               | 1.809                   | 0.000                 | 0.000                   | 0.585                | 0.052                  | 0.058                 |
|                      | 0.000             | 1.200             | 0.883                  | 0.577             | 1.157               | 3.804                   | 0.058                 | 0.221                   | 0.786                | 1.003                  | 0.190                 |
|                      | 0.000             | 0.000             | 0.000                  | 0.000             | 0.000               | 0.758                   | 0.000                 | 0.000                   | 0.554                | 0.025                  | 0.045                 |
|                      | 0.000             | 1.599             | 1.029                  | 1.411             | 1.388               | 4.615                   | 0.287                 | 0.982                   | 1.540                | 5.028                  | 0.717                 |
| <b>K1-B</b>          | 0.000             | 0.835             | 0.377                  | 0.799             | 0.438               | 3.242                   | 0.000                 | 0.000                   | 0.416                | 0.878                  | 0.068                 |
|                      | 0.000             | 0.414             | 0.213                  | 0.509             | 0.112               | 2.245                   | 0.000                 | 0.000                   | 0.226                | 0.564                  | 0.000                 |
|                      | 0.183             | 1.008             | 0.699                  | 1.010             | 0.732               | 4.171                   | 0.000                 | 0.000                   | 0.949                | 1.342                  | 0.617                 |
|                      | 0.000             | 0.000             | 0.000                  | 0.185             | 0.000               | 1.536                   | 0.000                 | 0.000                   | 0.000                | 0.329                  | 0.000                 |
|                      | 1.535             | 2.035             | 1.190                  | 1.349             | 1.194               | 6.138                   | 0.243                 | 0.000                   | 1.191                | 3.961                  | 1.656                 |
| <b>K2-B</b>          | 0.067             | 1.062             | 0.159                  | 0.555             | 0.255               | 2.916                   | 0.047                 | 0.209                   | 0.385                | 0.613                  | 0.027                 |
|                      | 0.000             | 0.633             | 0.000                  | 0.266             | 0.007               | 1.674                   | 0.000                 | 0.000                   | 0.187                | 0.268                  | 0.005                 |
|                      | 0.254             | 1.173             | 0.654                  | 1.199             | 0.590               | 4.932                   | 0.256                 | 0.503                   | 0.851                | 2.010                  | 0.245                 |
|                      | 0.000             | 0.127             | 0.000                  | 0.000             | 0.000               | 0.720                   | 0.000                 | 0.000                   | 0.000                | 0.000                  | 0.000                 |
|                      | 0.351             | 1.414             | 1.028                  | 1.522             | 1.208               | 8.388                   | 0.607                 | 0.587                   | 1.347                | 3.067                  | 0.593                 |
| <b>K3-friendly-B</b> | 0.000             | 0.997             | 0.415                  | 0.657             | 0.440               | 2.644                   | 0.000                 | 0.000                   | 0.602                | 0.620                  | 0.000                 |
|                      | 0.000             | 0.574             | 0.155                  | 0.445             | 0.000               | 1.613                   | 0.000                 | 0.000                   | 0.297                | 0.439                  | 0.000                 |
|                      | 0.767             | 1.197             | 0.632                  | 1.259             | 0.744               | 3.031                   | 0.081                 | 0.384                   | 1.024                | 0.889                  | 0.132                 |
|                      | 0.000             | 0.248             | 0.000                  | 0.000             | 0.000               | 0.403                   | 0.000                 | 0.000                   | 0.000                | 0.000                  | 0.000                 |
|                      | 2.579             | 1.936             | 0.872                  | 1.524             | 1.413               | 6.062                   | 0.458                 | 0.545                   | 1.778                | 1.273                  | 0.791                 |
| <b>K3-free-B</b>     | 0.000             | 0.410             | 0.496                  | 0.502             | 0.545               | 2.897                   | 0.082                 | 0.000                   | 0.803                | 1.117                  | 0.022                 |
|                      | 0.000             | 0.220             | 0.434                  | 0.000             | 0.000               | 2.286                   | 0.000                 | 0.000                   | 0.000                | 0.774                  | 0.000                 |
|                      | 0.000             | 0.848             | 0.609                  | 0.842             | 0.876               | 3.646                   | 0.180                 | 0.467                   | 0.985                | 2.453                  | 0.636                 |
|                      | 0.000             | 0.000             | 0.163                  | 0.000             | 0.000               | 1.760                   | 0.000                 | 0.000                   | 0.000                | 0.000                  | 0.000                 |
|                      | 0.351             | 1.059             | 0.618                  | 0.914             | 1.335               | 5.014                   | 0.213                 | 0.701                   | 1.301                | 4.421                  | 0.959                 |

371  
372  
373  
374  
375



|                      | 45                       | 46                  | 47                   | 48               | 49                 | 50                   | 51                        | 52                                   | 53                        | 54    |
|----------------------|--------------------------|---------------------|----------------------|------------------|--------------------|----------------------|---------------------------|--------------------------------------|---------------------------|-------|
|                      | <i>Dielma fastidiosa</i> | <i>Turicibacter</i> | <i>colarctobacte</i> | <i>Dialister</i> | <i>Veillonella</i> | <i>Fusobacterium</i> | <i>Saccharimonadaceae</i> | <i>Parasutterella:herichia/Shige</i> | <i>Enterobacteriaceae</i> |       |
| <b>K1-E</b>          | 0.000                    | 0.127               | 0.000                | 0.198            | 0.659              | 0.000                | 0.052                     | 0.065                                | 0.701                     | 0.000 |
|                      | 0.000                    | 0.000               | 0.000                | 0.010            | 0.126              | 0.000                | 0.005                     | 0.000                                | 0.243                     | 0.000 |
|                      | 0.103                    | 0.154               | 0.275                | 0.483            | 1.033              | 0.013                | 0.107                     | 0.282                                | 1.733                     | 0.044 |
|                      | 0.000                    | 0.000               | 0.000                | 0.000            | 0.000              | 0.000                | 0.000                     | 0.000                                | 0.000                     | 0.000 |
|                      | 0.105                    | 0.366               | 0.725                | 0.543            | 1.746              | 0.052                | 0.148                     | 0.796                                | 6.094                     | 0.346 |
| <b>K2-E</b>          | 0.054                    | 0.000               | 0.000                | 0.047            | 0.304              | 0.000                | 0.008                     | 0.100                                | 0.821                     | 0.000 |
|                      | 0.016                    | 0.000               | 0.000                | 0.000            | 0.019              | 0.000                | 0.000                     | 0.000                                | 0.415                     | 0.000 |
|                      | 0.148                    | 0.134               | 0.048                | 0.233            | 0.970              | 0.000                | 0.033                     | 0.531                                | 3.503                     | 0.078 |
|                      | 0.000                    | 0.000               | 0.000                | 0.000            | 0.000              | 0.000                | 0.000                     | 0.000                                | 0.000                     | 0.000 |
|                      | 0.231                    | 0.924               | 0.649                | 0.331            | 1.043              | 0.029                | 0.116                     | 1.409                                | 15.267                    | 0.165 |
| <b>K3-friendly-E</b> | 0.000                    | 0.000               | 0.107                | 0.011            | 0.128              | 0.000                | 0.000                     | 0.448                                | 1.876                     | 0.026 |
|                      | 0.000                    | 0.000               | 0.000                | 0.000            | 0.000              | 0.000                | 0.000                     | 0.000                                | 0.495                     | 0.000 |
|                      | 0.035                    | 0.103               | 0.605                | 0.311            | 1.079              | 0.023                | 0.035                     | 1.525                                | 3.469                     | 0.545 |
|                      | 0.000                    | 0.000               | 0.000                | 0.000            | 0.000              | 0.000                | 0.000                     | 0.000                                | 0.109                     | 0.000 |
|                      | 0.297                    | 0.625               | 0.847                | 0.561            | 1.833              | 0.406                | 0.114                     | 4.622                                | 13.689                    | 0.732 |
| <b>K3-free-E</b>     | 0.080                    | 0.000               | 0.000                | 0.246            | 0.493              | 0.000                | 0.000                     | 0.369                                | 0.717                     | 0.000 |
|                      | 0.000                    | 0.000               | 0.000                | 0.000            | 0.000              | 0.000                | 0.000                     | 0.000                                | 0.371                     | 0.000 |
|                      | 0.110                    | 0.058               | 0.101                | 0.339            | 1.103              | 0.000                | 0.021                     | 0.818                                | 0.903                     | 0.080 |
|                      | 0.000                    | 0.000               | 0.000                | 0.000            | 0.000              | 0.000                | 0.000                     | 0.000                                | 0.174                     | 0.000 |
|                      | 0.218                    | 0.624               | 0.104                | 0.514            | 1.673              | 0.260                | 0.062                     | 0.880                                | 1.169                     | 0.240 |
| <b>K1-B</b>          | 0.006                    | 0.000               | 0.041                | 0.000            | 0.156              | 0.000                | 0.029                     | 0.075                                | 0.381                     | 0.000 |
|                      | 0.000                    | 0.000               | 0.000                | 0.000            | 0.000              | 0.000                | 0.000                     | 0.000                                | 0.000                     | 0.000 |
|                      | 0.136                    | 0.071               | 0.214                | 0.213            | 0.866              | 0.000                | 0.065                     | 0.630                                | 1.032                     | 0.000 |
|                      | 0.000                    | 0.000               | 0.000                | 0.000            | 0.000              | 0.000                | 0.000                     | 0.000                                | 0.000                     | 0.000 |
|                      | 0.358                    | 0.436               | 0.636                | 0.471            | 1.112              | 0.039                | 0.110                     | 1.112                                | 10.716                    | 0.465 |
| <b>K2-B</b>          | 0.097                    | 0.000               | 0.000                | 0.098            | 0.104              | 0.000                | 0.022                     | 0.089                                | 0.650                     | 0.000 |
|                      | 0.000                    | 0.000               | 0.000                | 0.000            | 0.000              | 0.000                | 0.000                     | 0.000                                | 0.367                     | 0.000 |
|                      | 0.279                    | 0.203               | 0.000                | 0.378            | 0.320              | 0.073                | 0.038                     | 0.454                                | 3.476                     | 0.041 |
|                      | 0.000                    | 0.000               | 0.000                | 0.000            | 0.000              | 0.000                | 0.000                     | 0.000                                | 0.000                     | 0.000 |
|                      | 0.977                    | 0.714               | 1.048                | 0.479            | 0.818              | 0.216                | 0.169                     | 1.354                                | 12.195                    | 0.387 |
| <b>K3-friendly-B</b> | 0.000                    | 0.000               | 0.046                | 0.127            | 0.372              | 0.000                | 0.000                     | 0.061                                | 1.073                     | 0.000 |
|                      | 0.000                    | 0.000               | 0.000                | 0.000            | 0.000              | 0.000                | 0.000                     | 0.000                                | 0.607                     | 0.000 |
|                      | 0.062                    | 0.133               | 0.319                | 0.318            | 0.712              | 0.000                | 0.103                     | 0.554                                | 3.609                     | 0.175 |
|                      | 0.000                    | 0.000               | 0.000                | 0.000            | 0.000              | 0.000                | 0.000                     | 0.000                                | 0.000                     | 0.000 |
|                      | 0.331                    | 0.980               | 0.964                | 0.451            | 1.742              | 0.501                | 0.222                     | 0.947                                | 33.980                    | 1.069 |
| <b>K3-free-B</b>     | 0.000                    | 0.000               | 0.000                | 0.150            | 0.354              | 0.000                | 0.000                     | 0.000                                | 0.779                     | 0.000 |
|                      | 0.000                    | 0.000               | 0.000                | 0.000            | 0.000              | 0.000                | 0.000                     | 0.000                                | 0.279                     | 0.000 |
|                      | 0.096                    | 0.000               | 0.000                | 0.335            | 1.196              | 0.000                | 0.000                     | 1.223                                | 4.078                     | 0.000 |
|                      | 0.000                    | 0.000               | 0.000                | 0.000            | 0.000              | 0.000                | 0.000                     | 0.000                                | 0.000                     | 0.000 |
|                      | 0.161                    | 0.015               | 0.290                | 0.385            | 1.441              | 0.295                | 0.087                     | 1.556                                | 5.905                     | 0.817 |
